# Supplementary material for: Impact of high-frequency ultrasound on nanocomposite microcapsules: in silico and in situ visualization
Source: Royal Society of Chemistry journal article supplement (doi:10.1039/c5cp05465f), 2015-10-28
Supplement: c5cp05465f1.pdf [file c5cp05465f1.pdf]

# SUPPLEMENTARY INFORMATION

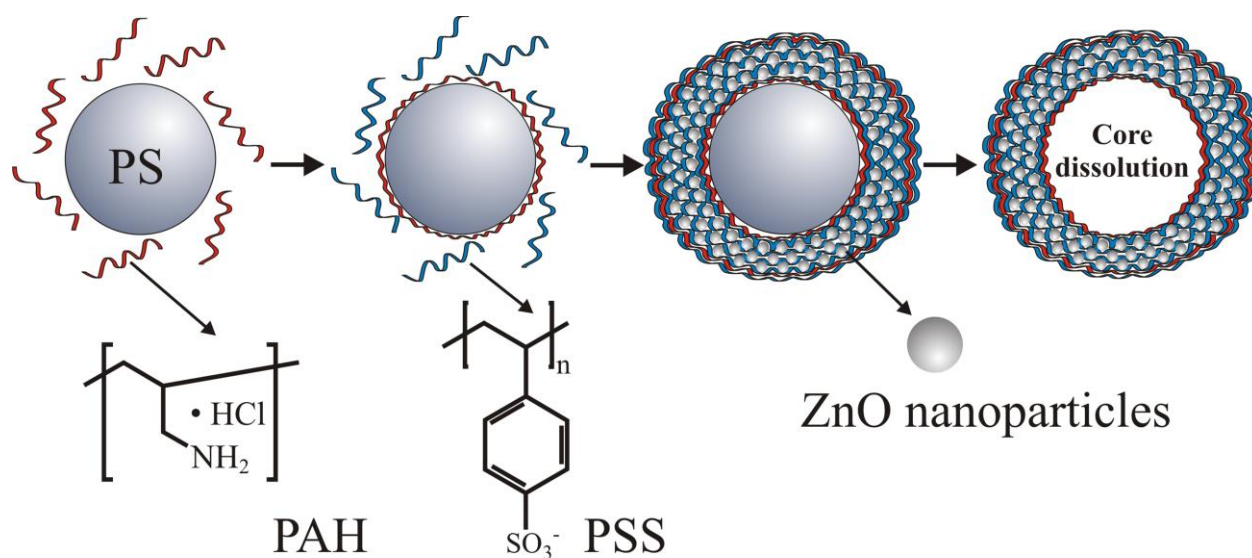

**Fig. 1S.** Process of LbL assembly on a polystyrene (PS) core

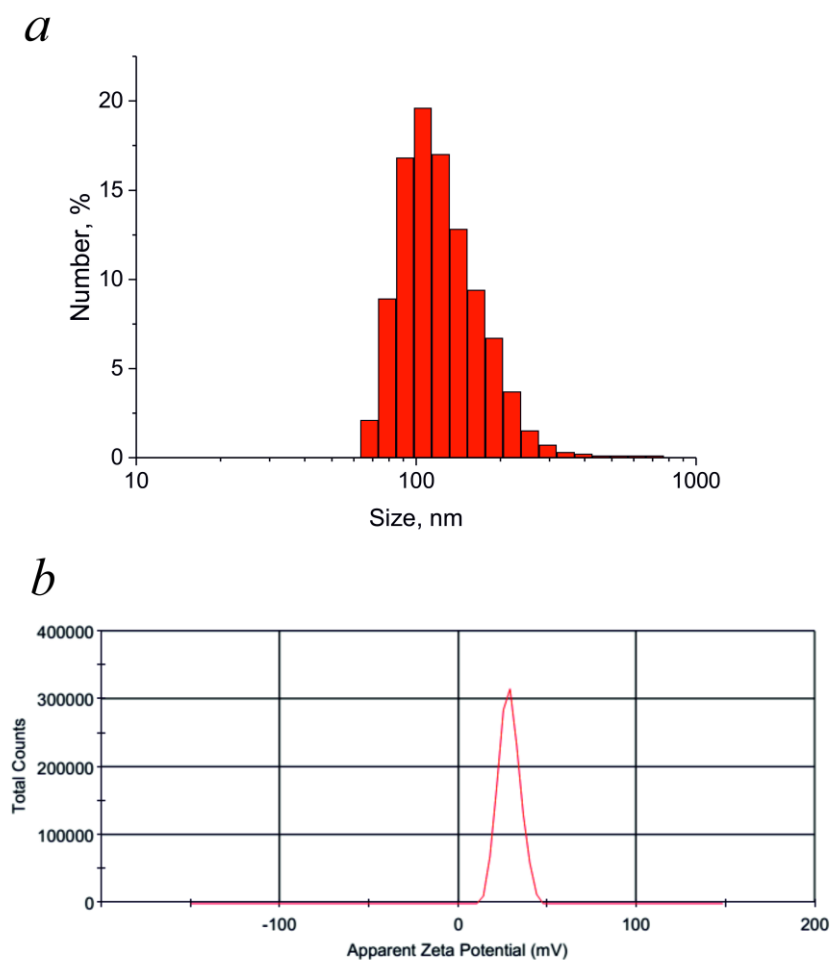

**Fig. 2S.** DLS particle size histogram (a) and  $\zeta$ -potential graph (b) of ZnO nanoparticles in aqueous medium.

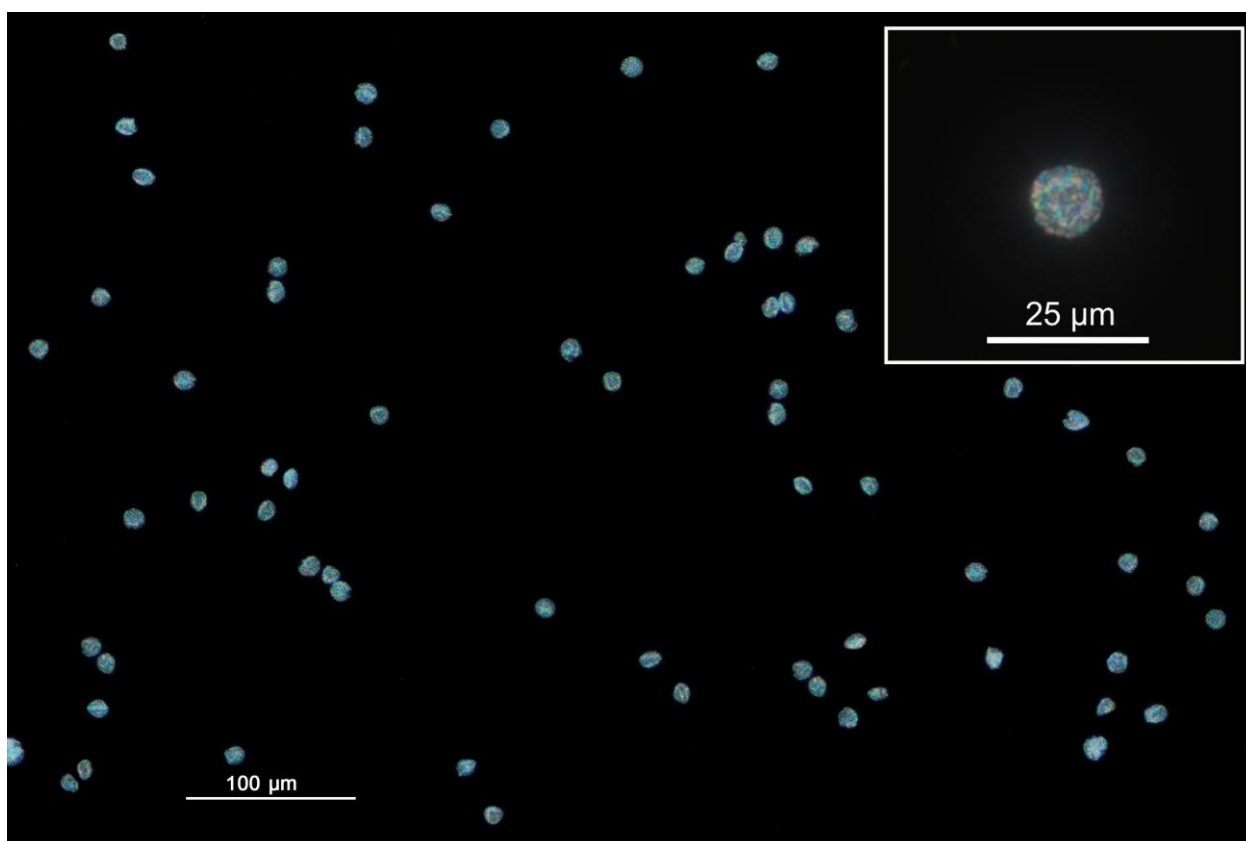

**Fig. 3S.** Dark field x20 (*a*) and x100 (*b*) images of nanocomposite microcapsules before ultrasonic treatment

**Supplementary Movie 1.** Video recording of the impact of high-frequency ultrasound on nanocomposite microcapsules
